# Supplementary material
Source: publisher figshare collection journal article supplement (https://tandf.figshare.com/articles/dataset/_/1266504)
Supplement: Supplementary file 3 [file 2]

Archive with 3 entries (3 files):
- EM-algorithm.pdf
- Data-Matlab-functions.zip
- Comparison-between-models.pdf
